# Supplementary material for: Adherence to a Vegetarian Diet and Diabetes Risk: A Systematic Review and Meta-Analysis of Observational Studies
Source: MDPI journal article supplement (doi:10.3390/nu9060603), 2017-06-14
Supplement: s1 [file s1]

Supplementary Table S1. Characteristics of studies included in the meta-analysis.

| No | First author<br>(publication<br>year) | Study<br>design | Sample size                             | Participant/<br>Study name                                        | Country/<br>Race | Age    | Sex | Definition of exposure                                                                                                                                                                                                                                                                                                                                                                                                                                                                                                           | Assessment of<br>exposure                                           | Outcome | Assessment of<br>outcome                                                                                             | Odds ratio<br>(95%CI)                                                                                                                                                                                                                                                                                                                                                                                                                                                   | Adjusted variables                                                                                                                                       |
|----|---------------------------------------|-----------------|-----------------------------------------|-------------------------------------------------------------------|------------------|--------|-----|----------------------------------------------------------------------------------------------------------------------------------------------------------------------------------------------------------------------------------------------------------------------------------------------------------------------------------------------------------------------------------------------------------------------------------------------------------------------------------------------------------------------------------|---------------------------------------------------------------------|---------|----------------------------------------------------------------------------------------------------------------------|-------------------------------------------------------------------------------------------------------------------------------------------------------------------------------------------------------------------------------------------------------------------------------------------------------------------------------------------------------------------------------------------------------------------------------------------------------------------------|----------------------------------------------------------------------------------------------------------------------------------------------------------|
| 1  | Agrawal<br>(2014)                     | Cross-sectional | 156,317<br>(M<br>56,742<br>W<br>56,742) | India's 3rd National<br>Family Health Survey<br>(NFHS-3, 2005-06) | India            | 20-49y | M&W | 1) Vegan: never consuming animal products<br>2) LV: consuming fruits, vegetables, pulses or<br>beans, milk or curd, either daily, weekly or<br>occasionally, but no fish, eggs or chicken or meat<br>3) LOV: consuming LV diet and egg<br>4) PV: consuming LOV diet and fish<br>5) SV: consuming fruits, vegetables, pulses or<br>beans, animal products either daily, weekly or<br>occasionally, but no fish<br>6) NV: consuming fruits, vegetables pulses or<br>beans, animal products either daily, weekly or<br>occasionally | Questionnaire on<br>frequency of<br>consumption of<br>selected food | DM      | Self-report (not<br>verified)                                                                                        | Men:<br>1) Vegan vs. NV[ref]:<br>0.70 (0.25, 1.96)<br>2) LV vs. NV[ref]:<br>0.66 (0.52, 0.82)<br>3) LOV vs. NV[ref]:<br>0.63 (0.39, 1.00)<br>4) PV vs. NV[ref]:<br>0.80 (0.43, 1.50)<br>5) SV vs. NV[ref]:<br>0.45 (0.29, 0.71)<br><br>Women:<br>1) Vegan vs. NV[ref]:<br>1.01 (0.65, 1.56)<br>2) LV vs. NV[ref]:<br>0.70 (0.59, 0.82)<br>3) LOV vs. NV[ref]:<br>0.77 (0.50-1.19)<br>4) PV vs. NV[ref]:<br>1.33 (0.95, 1.87)<br>3) SV vs. NV[ref]:<br>1.09 (0.81, 1.47) | Age, gender,<br>education,<br>household wealth,<br>rural/urban<br>residence, religion,<br>caste, smoking,<br>alcohol use,<br>television watching,<br>BMI |
| 2  | Bharati<br>(2011)                     | Cross-sectional | 812                                     | Adults not taking any<br>type of anti-diabetic drugs              | India            | ≥30y   | M&W | Not clearly defined                                                                                                                                                                                                                                                                                                                                                                                                                                                                                                              | Interview<br>(type of food,<br>dietary habit)                       | DM      | 1) Fasting glucose<br>level ≥126mg/dl<br>and<br>2) not on treatment                                                  | NV vs. V[ref]:<br>5.738 (1.350, 24.396)                                                                                                                                                                                                                                                                                                                                                                                                                                 | Age, residence,<br>education, tobacco<br>addiction, BMI,<br>waist hip ratio, total<br>blood cholesterol                                                  |
| 3  | Brathwaite<br>(2003)                  | Cross-sectional | 407                                     | Barbadian<br>Seventh-Day-Adventists                               | Barbados         | 25-74y | M&W | 1) Self-reported vegetarian(SRV)<br>2) Vegetarian by definition(VBD): consuming<br>meat or poultry <1 d/wk                                                                                                                                                                                                                                                                                                                                                                                                                       | Self-report                                                         | DM      | 1) Self-report<br>according to<br>physician diagnosis<br>or<br>2) Fasting blood<br>glucose(≥7.8<br>mmol/L, 140mg/dL) | 1) Non-SRV vs. SRV[ref]:<br>1.27 (0.77, 2.10)<br><br>2) Non-VBD vs. VBD[ref]:<br>1.34 (0.70, 2.57)                                                                                                                                                                                                                                                                                                                                                                      | Not available                                                                                                                                            |



|   |                    |                 |                            |                                                                                          |                       |                                                                                                                 |     |                                                                                                                                                                                                                                                                                                                                                                            |                                            |    |                                                                                                                                                      |                                                                                                                                        |                                                                                                                              |
|---|--------------------|-----------------|----------------------------|------------------------------------------------------------------------------------------|-----------------------|-----------------------------------------------------------------------------------------------------------------|-----|----------------------------------------------------------------------------------------------------------------------------------------------------------------------------------------------------------------------------------------------------------------------------------------------------------------------------------------------------------------------------|--------------------------------------------|----|------------------------------------------------------------------------------------------------------------------------------------------------------|----------------------------------------------------------------------------------------------------------------------------------------|------------------------------------------------------------------------------------------------------------------------------|
| 4 | Chiang<br>(2013)   | Case-control    | 706                        | Age-matched volunteer helpers of Buddhist Tzu Chi Foundation                             | Taiwan                | Mean 56.4y                                                                                                      | W   | V: practiced vegetarian diet at all meals daily and ≥1y<br>(V+LV+OV+LOV)                                                                                                                                                                                                                                                                                                   | Dietary questionnaire                      | DM | 1) Receiving medications for diabetes or<br>2) Fasting glucose levels ≥126 mg/dL                                                                     | V vs. NV[ref]:<br>0.62 (0.30, 1.27)                                                                                                    | BMI, waist, glucose levels, systolic blood pressure, TG, LDL-C, HDL-C, HOMA-IR                                               |
| 5 | Chiu<br>(2014)     | Cross-sectional | 4,384                      | Taiwanese Buddhist volunteers who receive a free health examination                      | Taiwan                | Mean<br>1) M: V 55y, Omni 55y<br>2) Pre-menopausal W: V 46y, Omni 45y,<br>3) Post-menopausal W: V 59y, Omni 58y | M&W | V: containing no fish, no meat                                                                                                                                                                                                                                                                                                                                             | FFQ                                        | DM | Self-report +<br>1) Physician diagnosis or<br>2) Prescription of diabetes medication or<br>3) Fasting plasma glucose ≥7.0 mmol/L or<br>4) HbA1C≥6.5% | V vs. NV[ref]:<br>1) M: 0.49 (0.28, 0.89)<br>2) Pre-menopausal W: 0.26 (0.06, 1.21)<br>3) Post-menopausal W: 0.25(0.15, 0.42)          | Age, family history of diabetes, education, LTPA, BMI, smoking (men only), alcohol (men only)                                |
| 6 | Fraser<br>(1999)   | Cross-sectional | 34,192 (M 13,857 W 20,341) | California Seventh-day Adventists (The Adventist Health Study-1, AHS-1)                  | US/Non-hispanic white | Mean 54.3y (M 53.1y W 55.0y)                                                                                    | M&W | 1) V: eating no meat, fish or poultry<br>2) SV: eating meat, fish or poultry in total < 1 time/wk<br>3) NV: eating these foods ≥1 time/wk.                                                                                                                                                                                                                                 | FFQ                                        | DM | 1) Self-report<br>2) Physician's diagnoses                                                                                                           | 1) NV vs. V[ref]:<br>M 1.97 (1.56, 2.47)<br>W 1.93 (1.65, 2.25)<br><br>2) SV vs. V[ref]:<br>M 1.35 (1.02, 1.78)<br>W 1.08 (0.89, 1.32) | Age                                                                                                                          |
| 7 | Jaccks<br>(2016)   | Cross-sectional | 15,665                     | Centre for Cardiometabolic Risk Reduction in South-Asia (CARRS)                          | Urban South Asian     | 20-60y                                                                                                          | M&W | 1) Vegan: eating meat, poultry, fish, egg, dairy never or < 1 time/mo<br>2) LV: eating meat, poultry, fish, egg never or < 1 time/mo<br>3) LOV: eating meat, poultry, fish never or < 1 time/mo<br>4) PV: eat meat, poultry never or < 1 time/mo<br>5) SV: eat meat, poultry, fish never or ≥ 1 time/mo but < 1 time/wk<br>6) NV: no restrictions on animal-based products | Food propensity questionnaire              | DM | 1) Fasting blood glucose ≥126mg/dl or<br>2) HbA1c ≥ 6.5% or<br>3) Treatment of previously diagnosed diabetes with oral agents or insulin             | V vs NV[ref]:<br>1.04 (0.86, 1.27)                                                                                                     | Age, sex, education, Tabacco, alcohol, city (CARRS)                                                                          |
|   |                    |                 | 2,159                      | National Health and Nutrition Examination Survey (NHANES)                                | US                    |                                                                                                                 |     |                                                                                                                                                                                                                                                                                                                                                                            | Food propensity questionnaire              |    |                                                                                                                                                      | V vs NV[ref]:<br>0.75 (0.29, 1.96)                                                                                                     |                                                                                                                              |
| 8 | Ponzio<br>(2015)   | Cross-sectional | 127,722                    | Health and Use of Health Care in Italy                                                   | Italy                 | Mean or range of age is not available                                                                           |     | Not clearly defined                                                                                                                                                                                                                                                                                                                                                        | Questionnaire on the type of diet consumed | DM | Not available                                                                                                                                        | V vs NV[ref]:<br>1.37 (1.06, 1.75)                                                                                                     | Age, gender, education, marital status, smoking, BMI, weight control, perceived health status, hypertension, chronic disease |
| 9 | Shridhar<br>(2014) | Cross-sectional | 6,555                      | Urban migrants, their rural siblings, urban residents of the Indian Migration Study(IMS) | India                 | Mean 40.9y                                                                                                      | M&W | LV: who ate no eggs, meat, poultry, fish                                                                                                                                                                                                                                                                                                                                   | FFQ                                        | DM | 1) Doctor -diagnosed and/or<br>2) Fasting plasma criterion of > 7.0 mmol/l                                                                           | V vs NV[ref]:<br>0.942 (0.792-1.121)                                                                                                   | No                                                                                                                           |



|    |                |                    |                            |                                                                                                         |                                                                                                                                                                                                       |            |     |                                                                                                                                                                                                                                                                                                                                                                                                                                                                                                                                                                               |                                 |    |                                                                                                             |                                                                                                                                                                              |                                                                                                                              |
|----|----------------|--------------------|----------------------------|---------------------------------------------------------------------------------------------------------|-------------------------------------------------------------------------------------------------------------------------------------------------------------------------------------------------------|------------|-----|-------------------------------------------------------------------------------------------------------------------------------------------------------------------------------------------------------------------------------------------------------------------------------------------------------------------------------------------------------------------------------------------------------------------------------------------------------------------------------------------------------------------------------------------------------------------------------|---------------------------------|----|-------------------------------------------------------------------------------------------------------------|------------------------------------------------------------------------------------------------------------------------------------------------------------------------------|------------------------------------------------------------------------------------------------------------------------------|
| 10 | Tonstad (2009) | Cross-sectional    | 60,903                     | Adventist church members (The Adventist Health Study, AHS-2)                                            | US, Canada: Black(black/African, West Indian/Caribbean, African, other black) nonblack(white non-Hispanic, Hispanic, Middle Eastern, Asian, Native Hawaiian/ other Pacific Islander, American Indian) | ≥30y       | M&W | 1) Vegan: consuming no animal products (red meat, poultry, fish, eggs, milk and dairy products <1time/mo)<br>2) LOV: consuming dairy products and/or eggs( ≥1 time/mo), but no fish or meat (red meat, poultry, fish <1 time/mo)<br>3) PV: consuming fish ( ≥1time/mo), dairy products and/or eggs but no red meat or poultry(red meat and poultry <1 time/mo)<br>4) SV: consuming dairy products and/or eggs and meat(red meat and poultry ≥1 time/mo and <1 time/wk)<br>5) NV: consuming animal products(red meat, poultry, fish, eggs, milk and dairy products >1 time/wk) | FFQ                             | DM | 1) Fasting glucose level (≥126 mg/dl)) or<br>2) Physician-based diagnosis                                   | 1) Vegan vs. NV[ref]: 0.51 (0.40, 0.66)<br><br>2) LOV vs. NV[ref]: 0.54 (0.49, 0.60)<br><br>3) PV vs. NV[ref]: 0.70 (0.61, 0.80)<br><br>4) SV vs. NV[ref]: 0.76 (0.65, 0.90) | Age, gender, ethnicity, physical activity, education, income, TV watching, hours of sleep, alcohol consumption, BMI          |
| 11 | Tonstad (2013) | Prospective cohort | 41,387                     | 1) Black and non-Black participants in the Adventist Health Study(AHS)-2<br>2) Free of diabetes         | US, Canada                                                                                                                                                                                            | ≥30y       | M&W | 1) Vegan<br>2) LOV<br>3) PV<br>4) SV<br>(see above Tonstad (2009))                                                                                                                                                                                                                                                                                                                                                                                                                                                                                                            | FFQ                             | DM | Self-report                                                                                                 | 1) Vegan vs. NV[ref]: 0.381 (0.236, 0.617)<br>2) LOV vs. NV[ref]: 0.618 (0.503, 0.760)<br>3) PV vs. NV[ref]: 0.790 (0.575, 1.086)<br>4) SV vs. NV[ref]: 0.486 (0.312, 0.755) | Age, BMI, gender, ethnicity, education, income, TV watching, hours of sleep, alcohol consumption, smoking, physical activity |
| 12 | Vang (2008)    | Prospective cohort | 8,401                      | California Seventh-day Adventists from Adventist Mortality Study (AMS) and Adventist Health Study (AHS) | US (non-hispanic white)                                                                                                                                                                               | 45-88y     | M&W | 1) V: consuming no meat<br>2) Individuals with occasional meat intake: consuming meat < 1time/wk<br>3) NV: consuming meat ≥1/wk                                                                                                                                                                                                                                                                                                                                                                                                                                               | FFQ                             | DM | Self-report(not verified)                                                                                   | 1) Long-term V vs NV[ref]: 0.746 (0.571, 0.971)<br><br>2) Long-term occasional meat intake vs. NV[ref]: 1.099 (0.427, 2.778)                                                 | Age, gender, education, physical activity, cigarette smoking, alcohol consumption, BMI                                       |
| 13 | Zhang (2010)   | Cross-sectional    | 19,003 (M 7,148, W 11,855) | Suburban residents                                                                                      | China                                                                                                                                                                                                 | Mean 48.0y | M&W | V: consuming no meat                                                                                                                                                                                                                                                                                                                                                                                                                                                                                                                                                          | Questionnaire on dietary habits | DM | 1) Fasting plasma glucose ≥7.0mmol/L or<br>2) Self-reported current treatment with antidiabetic medications | V vs. NV[ref]: 0.68 (0.55, 0.86)                                                                                                                                             | Age, sex, smoking, drinking, other potential confounders                                                                     |

M Men, W Women, mo month, wk week, d day, LV Lacto-vegetarian, LOV Lacto-ovo-vegetarian, PV Pesco-vegetarian, SV Semi-vegetarian, NV Non-vegetarian, V vegetarian, Omni Omnivore, FFQ Food Frequency Questionnaire, DM Diabetes Mellitus, ref reference, BMI Body mass index, TG Triglycerides, LDL-C Low density lipoprotein, HDL-C High density lipoprotein, HOMA-IR Homeostasis Model Assessment-Insulin Resistance, LTPA Leisure time physical activity.
